# Supplementary material for: Polydioxanone-Based Membranes for Bone Regeneration
Source: MDPI journal article supplement (doi:10.3390/polym13111685), 2021-05-21
Supplement: s1 [file s1]

# Supplementary Materials: Polydioxanone-Based Membranes for Bone Regeneration

Sybele Saska, Livia Pilatti, Edvaldo Santos de Sousa Silva, Magda Aline Nagasawa, Diana Câmara, Nelson Lizier, Eduardo Finger, Marta Dyszkiewicz Konwinska, Bartosz Kempisty, Samy Tunchel, Alberto Blay and Jamil Awad Shibli

**Table S1.** Clinical signs/observations to systemic toxicity assay.

| Group   | Animal | Clinical evaluation |          |          | Mortality |
|---------|--------|---------------------|----------|----------|-----------|
|         |        | 24 hours            | 48 hours | 72 hours |           |
| Treated | 1      | NO                  | NO       | NO       | 0/5 (0%)  |
|         | 2      | NO                  | NO       | NO       |           |
|         | 3      | NO                  | NO       | NO       |           |
|         | 4      | NO                  | NO       | NO       |           |
|         | 5      | NO                  | NO       | NO       |           |
| Control | 1      | NO                  | NO       | NO       | 0/5 (0%)  |
|         | 2      | NO                  | NO       | NO       |           |
|         | 3      | NO                  | NO       | NO       |           |
|         | 4      | NO                  | NO       | NO       |           |
|         | 5      | NO                  | NO       | NO       |           |

NO: no observation.

**Table S2.** Variation in the weight of the animals in post-operative conditions.

| Sex    | Group    | Initial weight (g)         | Final weight (g)           | Variation <sup>1</sup>     |
|--------|----------|----------------------------|----------------------------|----------------------------|
| Female | PDO      | 2,482.3 ± 293.6<br>(N = 6) | 3,898.5 ± 329.9<br>(N = 4) | 1,295.5 ± 295.7<br>(N = 4) |
|        | Collagen | 2,457.3 ± 325.6<br>(N = 6) | 4,250.7 ± 329.1<br>(N = 6) | 1,793.3 ± 358.8<br>(N = 6) |
|        | P value  | 0.63 <sup>2</sup>          | 0.14                       | 0.05                       |
| Male   | PDO      | 2,579.7 ± 106.3<br>(N = 6) | 3,698.3 ± 228.8<br>(N = 6) | 1,118.7 ± 298.4<br>(N = 6) |
|        | Collagen | 2,685.6 ± 210.0<br>(N = 5) | 3,983.0 ± 474.8<br>(N = 4) | 1,244.0 ± 360.8<br>(N = 4) |
|        | P value  | 0.30                       | 0.23                       | 0.57                       |

N: Number of animals in the group (N of the animals to final weight was different to the Female/PDO and Male/Collagen groups because during the experimental period, three animals died).

<sup>1</sup>Variation = final weight – initial weight.

<sup>2</sup>Mann-Whitney test.

**Table S3.** Absolute and relative weights of the liver, left kidney, and spleen in post-operative conditions.

| Organ |        | Female                  |                              |         | Male                    |                              |         |
|-------|--------|-------------------------|------------------------------|---------|-------------------------|------------------------------|---------|
|       |        | PDO membrane<br>(N = 4) | Collagen membrane<br>(N = 6) | P value | PDO membrane<br>(N = 6) | Collagen membrane<br>(N = 4) | P value |
| Liver | AW (g) | 99.40 ± 19.24           | 106.71 ± 35.97               | 0.72    | 97.73 ± 19.67           | 119.75 ± 20.49               | 0.13    |
|       | RW (g) | 2.540 ± 0.381           | 2.485 ± 0.75                 | 0.90    | 2.641 ± 0.504           | 2.993 ± 0.165                | 0.22    |
|       | AW (g) | 1.310 ± 0.840           | 1.000 ± 0.21                 | 0.51    | 0.89 ± 0.43             | 0.87 ± 0.22                  | 0.95    |

N: number of animals in the group; AW: Absolute weight; RW: Relative weight (organ weight/final body weight  $\times 100$ ).

**Table S4.** Clinical evaluation of the control and treated groups after implantation (weekly).

| Group   | Animal           | Day |    |    |    |    |    |                |    |    |    |    |    |    |    |
|---------|------------------|-----|----|----|----|----|----|----------------|----|----|----|----|----|----|----|
|         |                  | 0   | 7  | 14 | 21 | 28 | 35 | 42             | 49 | 56 | 63 | 70 | 77 | 84 | 90 |
| Treated | 01F <sup>1</sup> | NO  | -  | -  | -  | -  | -  | -              | -  | -  | -  | -  | -  | -  | -  |
|         | 02F              | NO  | NO | NO | NO | NO | NO | NO             | NO | NO | NO | NO | NO | NO | NO |
|         | 03F              | NO  | NO | NO | NO | NO | NO | NO             | NO | NO | NO | NO | NO | NO | NO |
|         | 04F              | NO  | 11 | NO | NO | NO | NO | NO             | NO | NO | NO | NO | NO | NO | NO |
|         | 05F              | NO  | 14 | NO | NO | NO | NO | NO             | NO | NO | NO | NO | NO | NO | NO |
|         | 06F <sup>2</sup> | NO  | 14 | -  | -  | -  | -  | -              | -  | -  | -  | -  | -  | -  | -  |
|         | 01M              | NO  | NO | NO | NO | NO | NO | 3 <sup>3</sup> | NO |
|         | 02M              | NO  | NO | NO | NO | NO | NO | NO             | NO | NO | NO | NO | NO | NO | NO |
|         | 03M              | NO  | NO | 7  | NO | NO | NO | NO             | NO | NO | NO | NO | NO | NO | NO |
|         | 04M              | NO  | NO | NO | NO | NO | NO | 3 <sup>3</sup> | NO |
| 05M     | NO               | NO  | NO | NO | NO | NO | NO | NO             | NO | NO | NO | NO | NO | NO |    |
| 06M     | NO               | NO  | NO | NO | NO | NO | NO | NO             | NO | NO | NO | NO | NO | NO |    |
| Control | 07F              | NO  | 7  | 7  | NO | NO | NO | NO             | NO | NO | NO | NO | NO | NO | NO |
|         | 08F              | NO  | NO | NO | NO | NO | NO | NO             | NO | NO | NO | NO | NO | NO | NO |
|         | 09F              | NO  | NO | NO | NO | NO | NO | NO             | NO | NO | NO | NO | NO | NO | NO |
|         | 10F              | NO  | NO | NO | NO | NO | NO | NO             | NO | NO | NO | NO | NO | NO | NO |
|         | 11F              | NO  | NO | NO | NO | NO | NO | NO             | NO | NO | NO | NO | NO | NO | NO |
|         | 12F              | NO  | 14 | NO | NO | NO | NO | NO             | NO | NO | NO | NO | NO | NO | NO |
|         | 07M              | NO  | NO | NO | NO | NO | NO | NO             | NO | NO | NO | NO | NO | NO | NO |
|         | 08M              | NO  | NO | NO | NO | NO | NO | NO             | NO | NO | NO | NO | NO | NO | NO |
|         | 09M              | NO  | 7  | 7  | NO | NO | NO | NO             | NO | NO | NO | 15 | 15 | 15 | 15 |
|         | 10M              | NO  | NO | NO | NO | NO | NO | NO             | NO | NO | NO | NO | NO | NO | NO |
| 11M     | NO               | NO  | NO | NO | NO | NO | NO | 3 <sup>4</sup> | -  | -  | -  | -  | -  | -  |    |

Clinical signs: NO – nothing observed; 1 - Death; 2 – Seizure; 3 – Mutilation; 4 – Prostration; 5 – Ataxia; 6 – Tremors; 7 – Local inflammation; 8 – Dyspnea; 9 – Tearing; 10 – Salivation; 11 – Diarrhea; 12 – Piloerection; 13 – Cachexia; 14 – Hematoma at implant site; 15 – Ocular secretion. / <sup>1</sup> Animal presented diarrhea and died on day 5 of the experimental period; <sup>2</sup> Animal presented diarrhea and died on the 11th of the experimental period; <sup>3</sup> Mutilation in the contralateral limb to the implant; <sup>4</sup> Animal presented an infected wound due to limb self-mutilation and was euthanized for humanitarian reasons on the 49th of the experimental period.

**Table S5.** Histological evaluation of tissue reaction after membrane implantation.

[illegible]

|                         |     |   |    |    |    |   |   |    |    |   |   |    |   |   |   |     |   |   |   |    |
|-------------------------|-----|---|----|----|----|---|---|----|----|---|---|----|---|---|---|-----|---|---|---|----|
| Fatty infiltrate        | 0   | 0 | 1  | 1  | 0  | 0 | 0 | 0  | 0  | 0 | 0 | 0  | 0 | 0 | 0 | 1   | 0 | 0 | 0 | 0  |
| Subtotal                | 1   | 0 | 1  | 3  | 0  | 0 | 0 | 0  | 0  | 0 | 0 | 0  | 0 | 0 | 0 | 2   | 0 | 0 | 0 | 0  |
| Total                   | 9   | 8 | 11 | 19 | 10 | 6 | 8 | 12 | 10 | 6 | 8 | 10 | 8 | 8 | 6 | 16  | 6 | 6 | 8 | 10 |
| Group Total             | 99  |   |    |    |    |   |   |    |    |   |   |    |   |   |   | 86  |   |   |   |    |
| Group Mean              | 9.9 |   |    |    |    |   |   |    |    |   |   |    |   |   |   | 8.6 |   |   |   |    |
| Mean Index <sup>1</sup> | 1.3 |   |    |    |    |   |   |    |    |   |   |    |   |   |   |     |   |   |   |    |

<sup>1</sup> Used to determine the tissue-reaction index.

**Table S6.** Evaluation of the implant location after necropsy.

| Group        | Animal | Macroscopic alterations | Group             | Animal | Macroscopic alterations |
|--------------|--------|-------------------------|-------------------|--------|-------------------------|
| PDO membrane | 02F    | NO                      | Collagen membrane | 07F    | NO                      |
|              | 03F    | NO                      |                   | 08F    | NO                      |
|              | 04F    | NO                      |                   | 09F    | NO                      |
|              | 05F    | NO                      |                   | 10F    | NO                      |
|              | 01M    | E                       |                   | 11F    | NO                      |
|              | 02M    | NO                      |                   | 12F    | NO <sup>1</sup>         |
|              | 03M    | NO                      |                   | 07M    | NO                      |
|              | 04M    | NO                      |                   | 08M    | NO                      |
|              | 05M    | NO                      |                   | 09M    | NO                      |
|              | 06M    | NO                      |                   | 10M    | NO                      |

NO: nothing observed; E: bony callus in tibia tuberosity.

<sup>1</sup>Non-repaired bone defect.

**Table S7.** Erythrograms of animals after implantation assay (mean ± SD).

| Group   | Parameters and reference values                       |                                 |                           |                          |                          |                         |                                    |
|---------|-------------------------------------------------------|---------------------------------|---------------------------|--------------------------|--------------------------|-------------------------|------------------------------------|
|         | Erythrocytes<br>(5.1 to 7.9 million/mm <sup>3</sup> ) | Hemoglobin<br>(10 to 17.4 g/dL) | Hematocyte<br>(33 to 50%) | ACV<br>(57.8 to 66.5 u3) | MCH<br>(17.1 to 23.5 pg) | CMCH<br>(29 to 37 g/dL) | Total Protein<br>(5.4 to 8.5 g/dL) |
| Treated | 6.04±1.09                                             | 12.61±1.92                      | 37.94±6.19                | 63.12±2.93               | 21.04±1.29               | 33.30±0.61              | 5.80±0.65                          |
| Control | 6.16±0.37                                             | 13.09±1.41                      | 40.04±2.78                | 65.08±3.37               | 21.30±2.31               | 32.70±2.92              | 5.86±0.21                          |
| P value | 0.36 <sup>1</sup>                                     | 0.53                            | 0.55 <sup>1</sup>         | 0.13 <sup>1</sup>        | 0.76                     | 0.54                    | 0.79                               |

SD: Standard Deviation; ACV: Average Corpuscular Volume; MCH: Middle Corpuscular Hemoglobin; CMCH: Concentration of Middle Corpuscular Hemoglobin.

<sup>1</sup> Mann-Whitney Test.

**Table S8.** Leukograms of animals after implantation assay (mean ± SD).

| Group   | Parameters and reference values                 |                        |                           |                          |                        |                            |                        |                                              |
|---------|-------------------------------------------------|------------------------|---------------------------|--------------------------|------------------------|----------------------------|------------------------|----------------------------------------------|
|         | Leukocytes<br>(5.2 to 12.5 ml/mm <sup>3</sup> ) | Metamyelocytes<br>(0%) | Neutrophils<br>(20 - 75%) | Eosinophils<br>(1 to 4%) | Basophils<br>(1 to 7%) | Lymphocytes<br>(30 to 85%) | Monocytes<br>(1 to 4%) | Platelets<br>(50 to 650 ml/mm <sup>3</sup> ) |
| Treated | 5.11±1.67                                       | 0.00±0.00              | 42.40±16.53               | 0.20±0.63                | 0.00±0.00              | 56.20±16.13                | 1.20±0.79              | 223.30±84.39                                 |
| Control | 6.38±1.16                                       | 0.00±0.00              | 45.00±13.15               | 0.40±0.70                | 0.00±0.00              | 53.10±12.87                | 1.50±0.71              | 267.90±54.81                                 |
| P value | 0.06                                            | -                      | 0.70                      | 0.50 <sup>1</sup>        | -                      | 0.64                       | 0.55 <sup>1</sup>      | 0.18                                         |

SD: Standard Deviation.

<sup>1</sup> Mann-Whitney Test.

**Table S9.** Blood count of animals after implantation assay (mean ± SD).

| Group   | PT        | APTT       |
|---------|-----------|------------|
| Treated | 6.56±0.13 | 21.03±2.74 |
| Control | 7.09±0.64 | 23.47±6.71 |

|         |                   |      |
|---------|-------------------|------|
| P value | 0.02 <sup>1</sup> | 0.32 |
|---------|-------------------|------|

SD: Standard Deviation; PT: prothrombin time; APTT: activated partial thromboplastin time.

<sup>1</sup> Mann-Whitney Test.

**Table S10.** Blood biochemistry of animals after implantation assay: Renal Function.

|         | Parameters and reference values |                                       |                               |                                  |                                   |                                   |
|---------|---------------------------------|---------------------------------------|-------------------------------|----------------------------------|-----------------------------------|-----------------------------------|
|         | Urea<br>(13 to 52<br>mg/dL)     | Creatinine<br>(0.80 to 1.80<br>mg/dL) | Sodium<br>(138 to 148 mmol/L) | Potassium<br>(3.3 to 6.9 mmol/L) | Chlorine<br>(92 to 112<br>mmol/L) | Calcium<br>(5.6 to 12.0<br>mg/dL) |
| Treated | 48.05±4.74                      | 1.20±0.23                             | 146.32±2.43                   | 4.97±0.47                        | 95.06±3.30                        | 13.51±0.36                        |
| Control | 47.09±7.32                      | 1.13±0.17                             | 147.15±1.83                   | 4.76±0.82                        | 96.41±4.33                        | 13.49±0.35                        |
| P value | 0.73                            | 0.46                                  | 0.40                          | 0.50                             | 0.44                              | 0.90                              |

SD: Standard Deviation.

**Table S11.** Blood biochemistry of animals after implantation assay: Liver function.

|         | Parameters and reference values |                                |                       |                      |                                    |                                       |                                 |                                  |
|---------|---------------------------------|--------------------------------|-----------------------|----------------------|------------------------------------|---------------------------------------|---------------------------------|----------------------------------|
|         | ALT<br>(31 to 60<br>U/L)        | Phosphatase<br>(90 to 145 U/L) | AST<br>(42 to 98 U/L) | GGT<br>(4 to 12 U/L) | Bilirubin<br>(0.3 to 0.8<br>mg/dL) | Total protein<br>(5.4 to 6.8<br>g/dL) | Albumin<br>(3.4 to 4.6<br>g/dL) | Globulin<br>(1.5 to 2.9<br>g/dL) |
| Treated | 64.90±12.17                     | 59.80±31.08                    | 38.20±13.36           | 5.70±1.06            | 0.12±0.06                          | 5.24±0.28                             | 3.32±0.20                       | 1.88±0.23                        |
| Control | 67.70±16.26                     | 62.40±23.82                    | 36.60±8.14            | 5.40±1.17            | 0.11±0.03                          | 5.16±0.21                             | 3.32±0.14                       | 1.84±0.13                        |
| P value | 0.67                            | 0.84                           | 0.94 <sup>1</sup>     | 0.57 <sup>1</sup>    | 0.97 <sup>1</sup>                  | 0.50                                  | 1.00                            | 0.65                             |

SD: Standard Deviation; ALT: alanine aminotransferase; AST: aspartate aminotransferase; GGT: Gamma Glutamyl Trans-ferase.

<sup>1</sup> Mann-Whitney Test.
